# Supplementary material for: Supramolecular Structuring of Hyaluronan-Lactose-Modified Chitosan Matrix: Towards High-Performance Biopolymers with Excellent Biodegradation
Source: PubMed Central journal article supplement (PMC8000860; doi:10.3390/biom11030389), 2021-03-05
Supplement: biomolecules-11-00389-s001.pdf [file biomolecules-11-00389-s001.pdf]

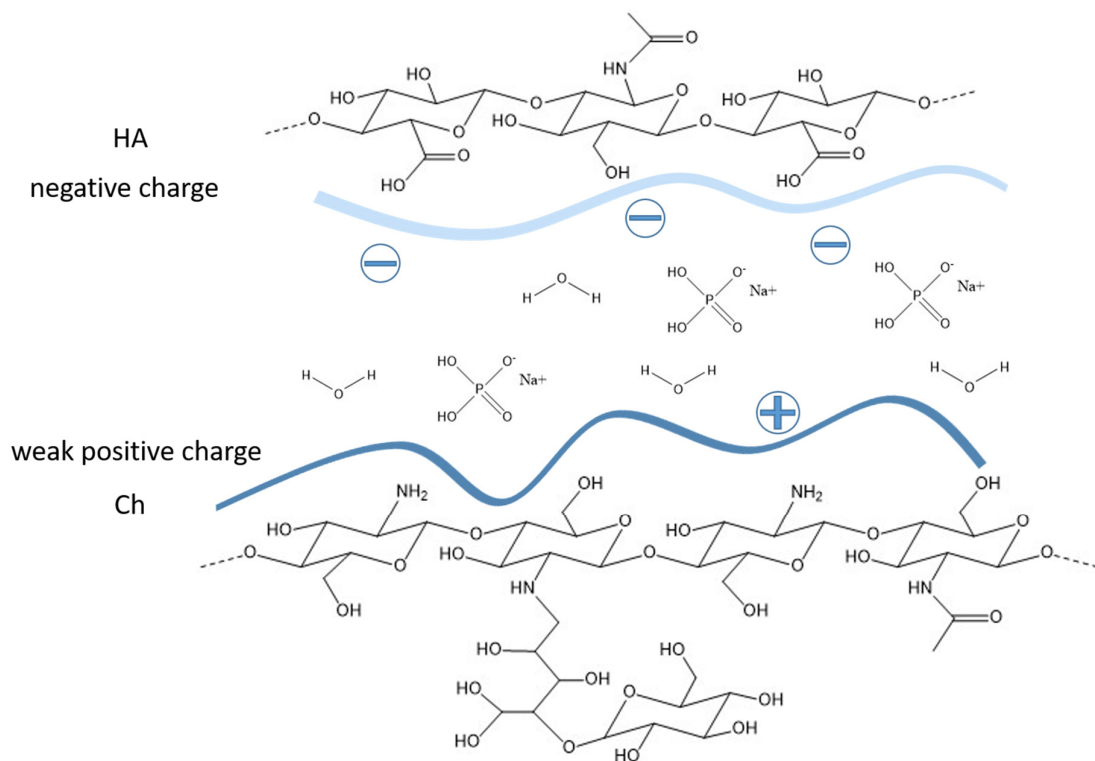

**Figure S1.** Schematic interaction between HA and Ch in Phosphate buffer saline.
